# Supplementary material for: A platinum(ii)–palladium(ii)–nickel(ii) heterotrimetallic coordination polymer showing a cooperative effect on catalytic hydrogen evolution
Source: Royal Society of Chemistry journal article supplement (doi:10.1039/c6cc08789b), 2016-12-05
Supplement: c6cc08789b1.pdf [file c6cc08789b1.pdf]

## **ELECTRONIC SUPPORTING INFORMATION (ESI)**

for

A platinum(II)-palladium(II)-nickel(II) heterotrimetallic coordination polymer showing a cooperative effect on catalytic hydrogen evolution

Naoto Kuwamura, Yoshinari Kurioka, and Takumi Konno\*

## General methods.

*trans*-[Pt(NH<sub>3</sub>)<sub>2</sub>(D-Hpen)<sub>2</sub>] was prepared according to a previously reported method.<sup>S1</sup> The IR spectra were measured with a JASCO FT/IR-4100 infrared spectrophotometer using KBr disks. The <sup>1</sup>H NMR spectra were measured on JEOL RESONANCE ECS-400 and JEOL RESONANCE ECA-500 NMR spectrometers at room temperature in D<sub>2</sub>O. Sodium 4,4-dimethyl-4-silapentane-1-sulfonate (DSS) was used as the internal reference. Elemental analyses (C, H, N) were performed at Osaka University. Voltammetry and controlled potential electrolysis were carried out at room temperature in a three-electrode cell under N<sub>2</sub> using a CHI720E potentiostat. The working electrode was a sample-modified glassy carbon electrode ( $\phi$  3.0 mm) prepared by drying 5  $\mu$ L of the sample solution or suspension (5 mg in 0.05 mL of lower aliphatic alcohols/water containing 5% of Nafion<sup>®</sup> (Aldrich)) on the electrode surface. The counter electrode was a platinum wire, and the reference electrode was an Ag/AgCl (3.0 M NaCl aq.) electrode. A 500  $\mu$ L sample was analyzed after 15 min using a gas chromatograph (Shimadzu GC-2014AT) with a thermal conductivity detector operating at 50°C. Ar was used as the carrier gas, and H<sub>2</sub> was detected on an activated molecular sieve column (ShincarbonST, Restek). Single-crystal X-ray diffraction measurements were performed on a RIGAKU RAXIS 7/FR-E imaging plate with graphite-monochromated Mo K $\alpha$  radiation ( $\lambda$  = 0.71075 Å) at 200 K. The intensity data were collected by the  $\omega$ -scan technique and empirically corrected for absorption. The structures of the complexes were solved by direct methods using SHELXS-2014.<sup>S2</sup> Structural refinements were carried out using full matrix least-squares (SHELXL-2014).<sup>S2</sup> Non-hydrogen atoms were refined anisotropically, except for the N and O atoms of the disordered nitrate anion and water molecules. Hydrogen atoms were placed at calculated positions, except for the water molecules. SIMU and ISOR restraints were used to model a part of the penicillamine backbone in [H<sub>4</sub>2]Cl<sub>4</sub>. Cl atoms were disordered in some parts. All of the structural parameters are summarized in Table S1.

## References.

- S1. Y. Kurioka, N. Kuwamura, N. Yoshinari, A. Igashira-Kamiyama and T. Konno, *Chem. Lett.*, 2015, **44**, 1330-1332.
- S2. G. M. Sheldrick, *Acta Crystallogr.*, 2008, **A64**, 112-122.

## Preparation of complexes.

### Preparation of $[\text{Pd}_2\text{Pt}_2(\text{NH}_3)_4(\text{D-pen})_4]$ ([2]).

To a brown suspension containing 0.43 g (1.9 mmol) of  $\text{Pd}(\text{OAc})_2$  in 50 mL of water was added 1.0 g (1.9 mmol) of *trans*- $[\text{Pt}(\text{NH}_3)_2(\text{D-Hpen})_2]$ . The mixture was stirred at room temperature for 4 h, which gave a clouded brown solution. After the filtration of unreacted  $\text{Pd}(\text{OAc})_2$ , the filtrate was evaporated to dryness. The orange residue was washed with EtOH. Yield: 1.29 g (92%). Calcd. for  $[\text{Pd}_2\text{Pt}_2(\text{NH}_3)_4(\text{D-pen})_4] \cdot 12\text{H}_2\text{O}$ : C, 16.27; H, 4.92; N, 7.59%. Anal. Found: C, 16.32; H, 4.76; N, 7.43%.

### Preparation of $[\text{Pd}_2\text{Pt}_2(\text{NH}_3)_4(\text{D-Hpen})_4]\text{Cl}_4$ ( $[\text{H}_42]\text{Cl}_4$ ).

To a brown solution containing 0.062 g (0.21 mmol) of  $\text{Na}_2[\text{PdCl}_4]$  in 2 mL of  $\text{H}_2\text{O}$  was added 0.10 g (0.19 mmol) of *trans*- $[\text{Pt}(\text{NH}_3)_2(\text{D-Hpen})_2]$  in 3 mL of  $\text{H}_2\text{O}$ . The orange mixture was stirred at  $0^\circ\text{C}$  for 1 h to give a yellow solution. EtOH was diffused into the solution for 3 days to produce yellow crystals. Yield: 25 mg (16%). Calcd. for  $[\text{Pd}_2\text{Pt}_2(\text{NH}_3)_4(\text{D-Hpen})_4]\text{Cl}_4 \cdot 12\text{H}_2\text{O}$ : C, 14.81; H, 4.72; N, 6.91%. Anal. Found: C, 14.76; H, 4.76; N, 6.96%.

### Preparation of $[\{\text{Ni}(\text{H}_2\text{O})_4\}\{\text{Pd}_2\text{Pt}_2(\text{NH}_3)_4(\text{D-pen})_4\}]\text{Cl}_2$ ([3]Cl<sub>2</sub>).

To an orange solution containing 0.10 g (0.068 mmol) of  $[\text{Pd}_2\text{Pt}_2(\text{NH}_3)_4(\text{D-pen})_4]$  in 15 mL of water was added 0.16 g (0.68 mmol) of  $\text{NiCl}_2 \cdot 6\text{H}_2\text{O}$  in 3 mL of water. After the solution was evaporated to dryness, to the black-green residue was added 5 mL of water. The mixture was stood at room temperature for 7 days. The resulting green platelet crystals were collected by filtration and washed with 5 mL of water. Yield: 0.07 g (60%). Calcd. for  $[\{\text{Ni}(\text{H}_2\text{O})_4\}\{\text{Pd}_2\text{Pt}_2(\text{NH}_3)_4(\text{D-pen})_4\}]\text{Cl}_2 \cdot 15\text{H}_2\text{O}$ : C, 13.87; H, 5.01; N, 6.47%. Anal. Found: C, 13.88; H, 4.80; N, 6.49%.

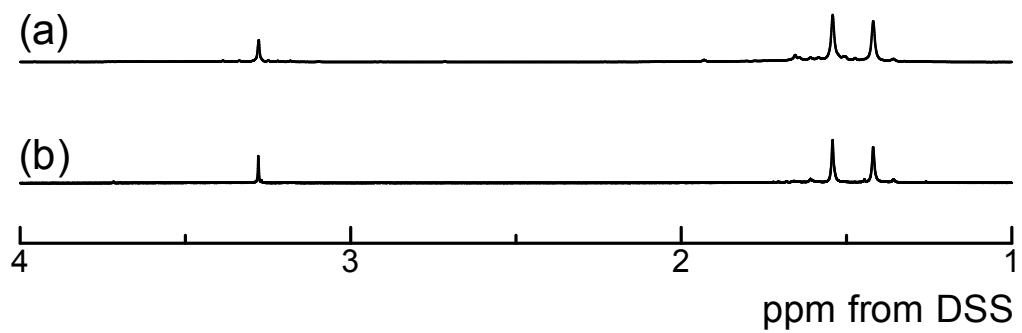

**Fig. S1.** <sup>1</sup>H NMR spectra of (a) the reaction solution of [H<sub>2</sub>1] with Na<sub>2</sub>[PdCl<sub>4</sub>], and (b) [2] in D<sub>2</sub>O.

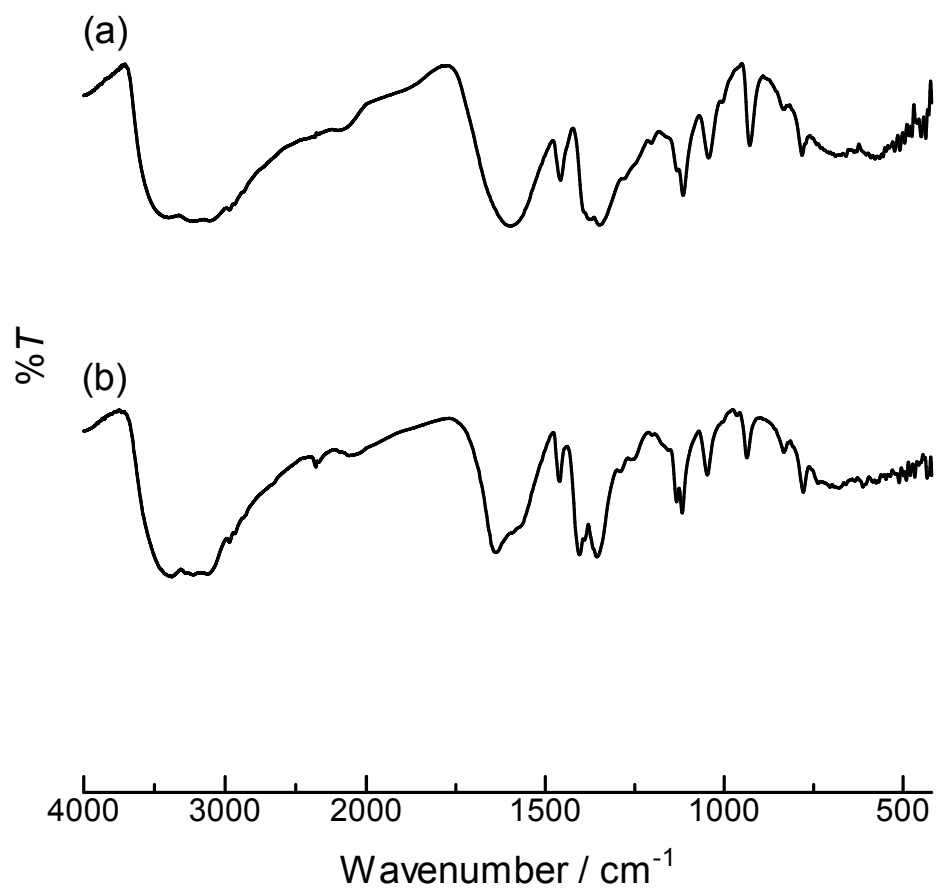

**Fig. S2.** IR spectra of (a) [2] and (b) [3]Cl<sub>2</sub>.

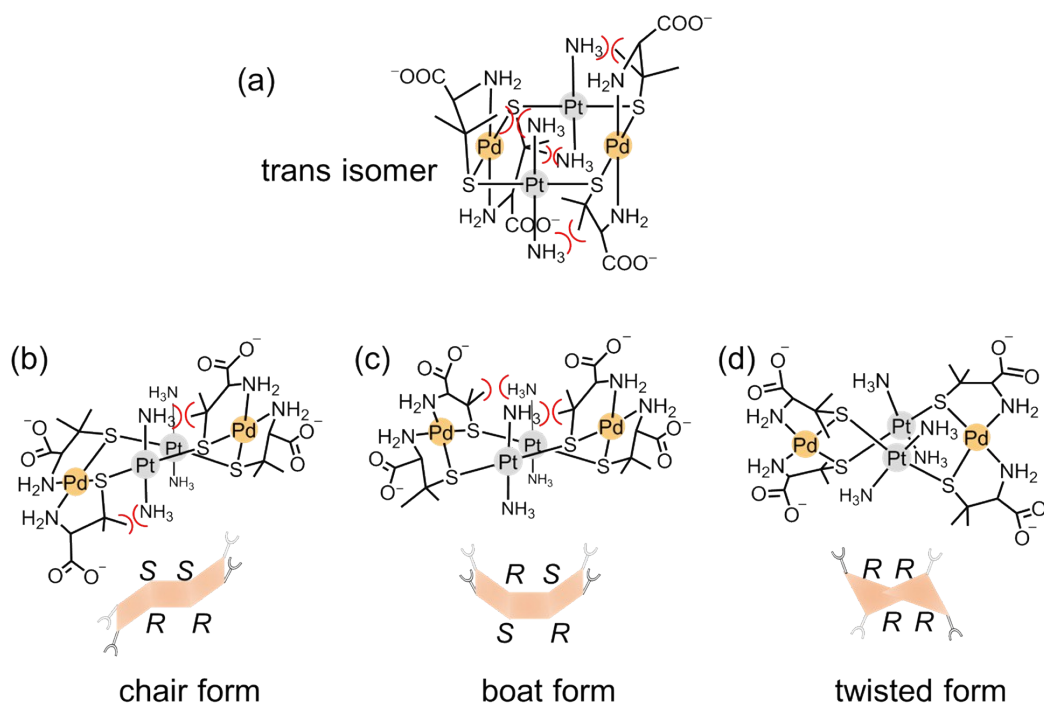

**Fig. S3.** Model structures of (a) the trans isomer and cis isomers with (b) the chair form, (c) boat form, and (d) twisted form of  $[\text{Pd}_2\text{Pt}_2(\text{NH}_3)_4(\text{D-pen})_4]$ . The red curve indicates the steric repulsions between methyl and ammine groups.

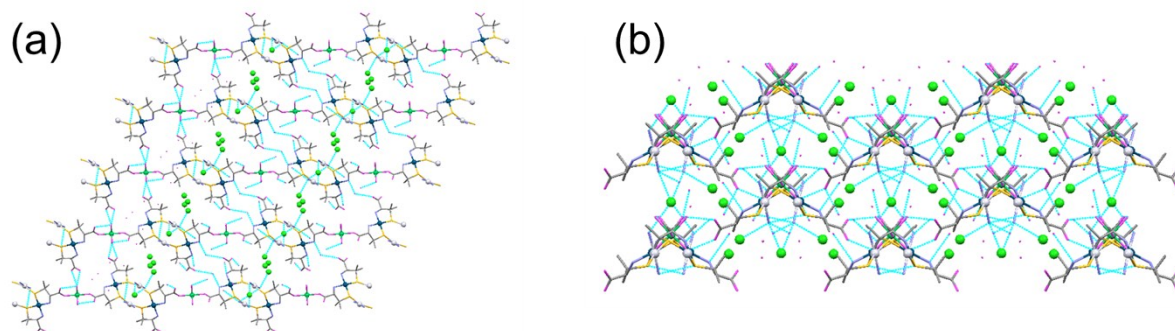

**Fig. S4.** Packing structure of  $[3]Cl_2$  viewed from the (a)  $b$  axis and (b)  $c$  axis. The green ball represents a chloride ion. H atoms are omitted for clarity. Blue dashed lines represent hydrogen bonds.

(a)

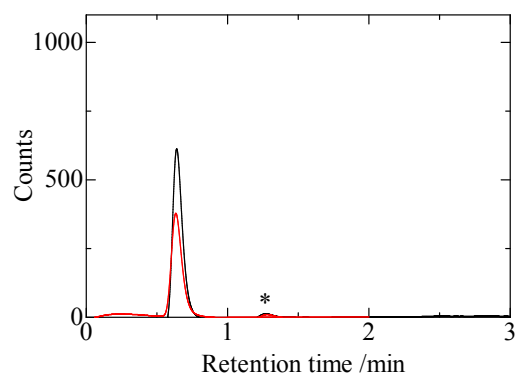

(b)

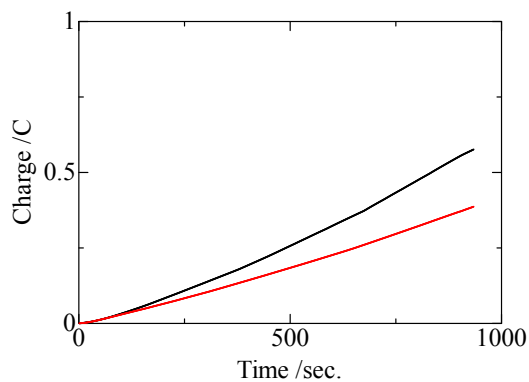

**Fig. S5.** (a) Gas chromatogram of the head space (500  $\mu\text{L}$ ) after the electrolysis of **[3]**Cl<sub>2</sub> (black line) and **[2]** (red line) attached to the glassy carbon electrode in H<sub>2</sub>O/CH<sub>3</sub>CN (v/v = 1/9) containing 0.1 M LiClO<sub>4</sub> at an applied voltage of  $-1.2$  V for 15 min. (\*) indicates O<sub>2</sub> gas contamination. (b) Charge vs. time plot of the electrolysis.



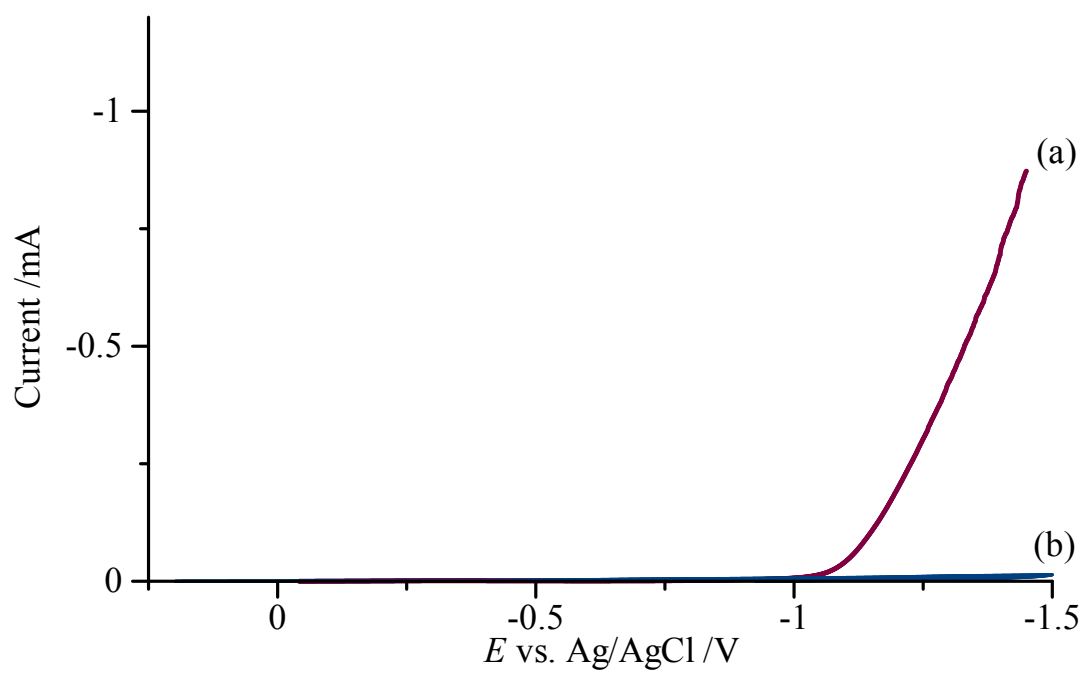

**Fig. S6.** Linear sweep voltammograms of  $[3]Cl_2$  attached to a glassy carbon electrode in (a)  $H_2O/CH_3CN$  ( $v/v = 1/9$ ) and (b) acetonitrile, both containing 0.1 M  $LiClO_4$ .

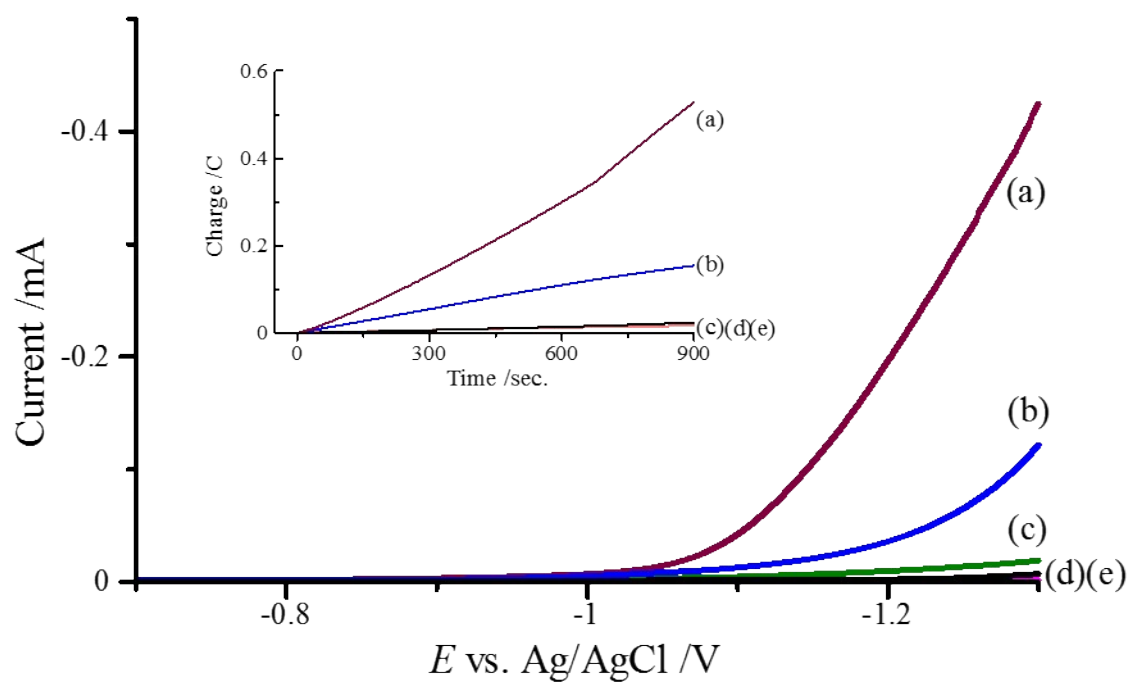

**Fig. S7.** Linear sweep voltammograms of (e)  $\text{Ni}(\text{CH}_3\text{COO})_2 \cdot 4\text{H}_2\text{O}$  attached to a glassy carbon electrode ( $0.07 \text{ cm}^2$ ), compared with (a)  $[\mathbf{3}]\text{Cl}_2$ , (b)  $[\mathbf{2}]$ , and (c)  $[\text{H}_2\mathbf{1}]$ , and (d) a bare glassy carbon electrode, in  $\text{H}_2\text{O}-\text{CH}_3\text{CN}$  ( $v/v = 1/9$ ) containing  $0.1 \text{ M LiClO}_4$ . The scan rate is  $0.01 \text{ V/sec}$ . Inset: Charge build-up versus time in extended potential-controlled electrolysis experiments at the applied potential of  $-1.20 \text{ V}$ .

**Table S1.** Crystallographic data for [H<sub>4</sub>2]Cl<sub>4</sub> and [3]Cl<sub>2</sub>.

|                                                                 | [H <sub>4</sub> 2]Cl <sub>4</sub>                                                                                               | [3]Cl <sub>2</sub>                                                                                                              |
|-----------------------------------------------------------------|---------------------------------------------------------------------------------------------------------------------------------|---------------------------------------------------------------------------------------------------------------------------------|
| Formula                                                         | C <sub>20</sub> H <sub>52</sub> Cl <sub>4</sub> N <sub>8</sub> O <sub>14.5</sub> Pd <sub>2</sub> Pt <sub>2</sub> S <sub>4</sub> | C <sub>20</sub> H <sub>48</sub> Cl <sub>2</sub> N <sub>8</sub> NiO <sub>26</sub> Pd <sub>2</sub> Pt <sub>2</sub> S <sub>4</sub> |
| Colour, shape                                                   | yellow, block                                                                                                                   | yellow, platelet                                                                                                                |
| <i>M</i>                                                        | 1509.71                                                                                                                         | 1677.49                                                                                                                         |
| Crystal system                                                  | monoclinic                                                                                                                      | monoclinic                                                                                                                      |
| Space group                                                     | <i>C</i> 2                                                                                                                      | <i>C</i> 2                                                                                                                      |
| <i>a</i> /Å                                                     | 16.407(4)                                                                                                                       | 22.503(3)                                                                                                                       |
| <i>b</i> /Å                                                     | 23.902(9)                                                                                                                       | 9.0650(10)                                                                                                                      |
| <i>c</i> /Å                                                     | 14.901(3)                                                                                                                       | 18.450(2)                                                                                                                       |
| <i>β</i> /°                                                     | 103.206(17)                                                                                                                     | 119.332(8)                                                                                                                      |
| <i>V</i> /Å <sup>3</sup>                                        | 5689(3)                                                                                                                         | 3281.0(7)                                                                                                                       |
| <i>Z</i>                                                        | 4                                                                                                                               | 2                                                                                                                               |
| <i>T</i> /K                                                     | 200                                                                                                                             | 200                                                                                                                             |
| <i>F</i> (000)                                                  | 2896                                                                                                                            | 1612                                                                                                                            |
| $\rho_{\text{calcd}}$ /g cm <sup>-3</sup>                       | 1.763                                                                                                                           | 1.698                                                                                                                           |
| $\mu$ (Mo K $\alpha$ ) /mm <sup>-1</sup>                        | 5.910                                                                                                                           | 5.342                                                                                                                           |
| Crystal size /mm <sup>3</sup>                                   | 0.20 × 0.20 × 0.15                                                                                                              | 0.10 × 0.08 × 0.03                                                                                                              |
| Limiting indices                                                | -21 ≤ <i>h</i> ≤ 21                                                                                                             | -28 ≤ <i>h</i> ≤ 29                                                                                                             |
|                                                                 | -30 ≤ <i>k</i> ≤ 31                                                                                                             | -11 ≤ <i>k</i> ≤ 11                                                                                                             |
|                                                                 | -19 ≤ <i>l</i> ≤ 19                                                                                                             | -23 ≤ <i>l</i> ≤ 19                                                                                                             |
| <i>R</i> <sub>1</sub> <sup>a</sup> ( <i>I</i> > 2σ( <i>I</i> )) | 0.0324                                                                                                                          | 0.0569                                                                                                                          |
| <i>wR</i> <sub>2</sub> <sup>b</sup> (all data)                  | 0.0998                                                                                                                          | 0.1658                                                                                                                          |
| GOF                                                             | 1.047                                                                                                                           | 1.058                                                                                                                           |
| Flack parameter                                                 | 0.014(3)                                                                                                                        | 0.079(8)                                                                                                                        |
| CCDC number                                                     | 1514220                                                                                                                         | 1514221                                                                                                                         |

<sup>a</sup>  $R_1 = \sum (|F_o| - |F_c|) / \sum (|F_o|)$ .

<sup>b</sup>  $wR_2 = [\sum w(F_o^2 - F_c^2)^2 / \sum w(F_o^2)^2]^{1/2}$ .
